# Supplementary material for: Liver-specific FGFR4 knockdown in mice on an HFD increases bile acid synthesis and improves hepatic steatosis
Source: PubMed Central journal article supplement (PMC9871743; doi:10.1016/j.jlr.2022.100324), 2022-12-29

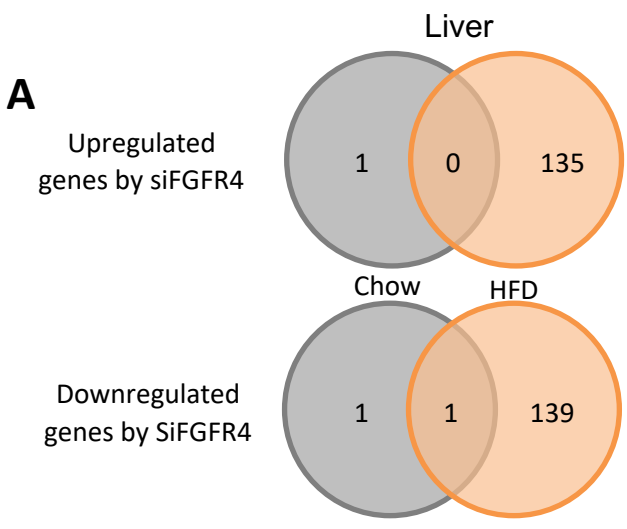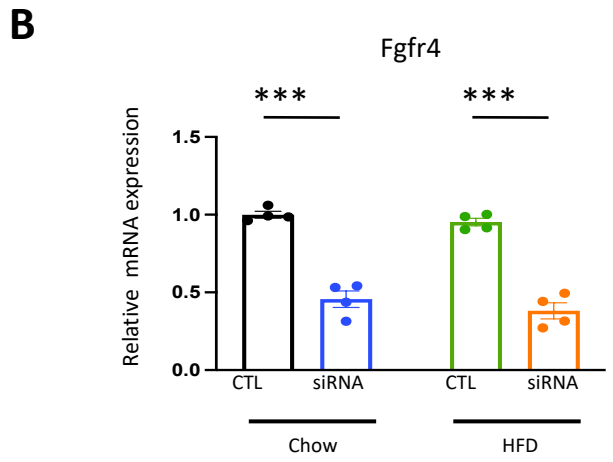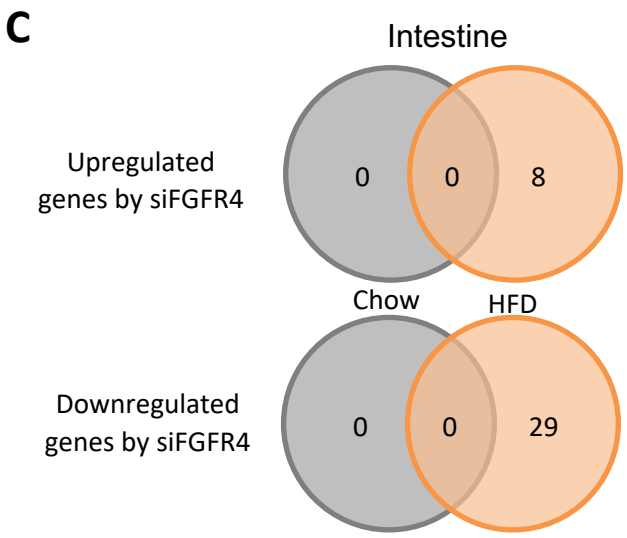

Supplement: mmc6.pdf [file mmc6.pdf]
